# Supplementary material for: Altered T Follicular Helper Cell Subsets and Function in Chronic Lymphocytic Leukemia
Source: PubMed Central journal article supplement (PMC8113764; doi:10.3389/fonc.2021.674492), 2021-04-28
Supplement: DataSheet_1.pdf [file DataSheet_1.pdf]

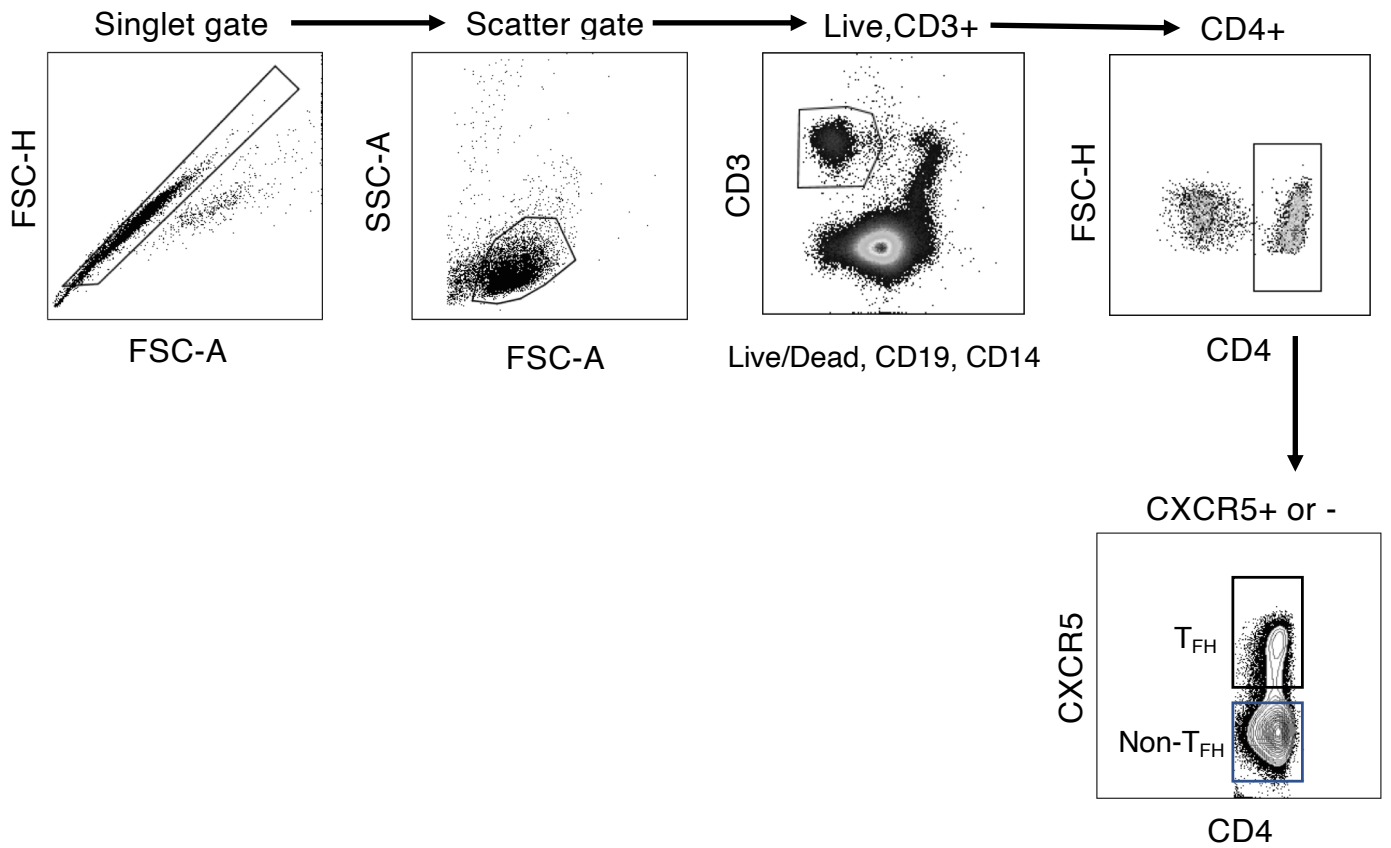

**Figure S1. Flow cytometry gating strategy**

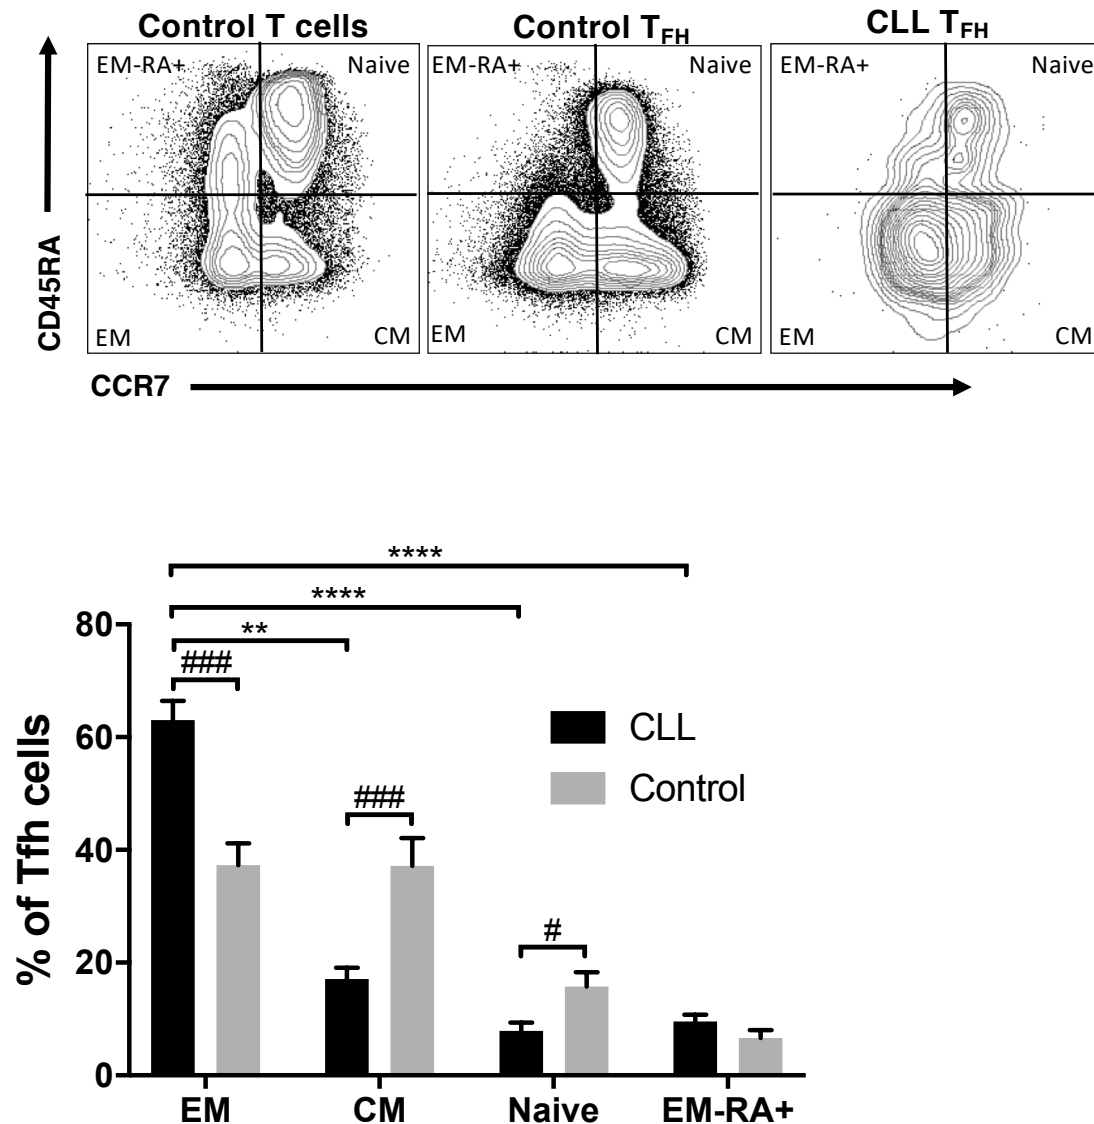

**Figure S2. CLL T<sub>FH</sub> have predominantly an effector memory phenotype**  
 CD4<sup>+</sup> T cells gated as CXCR5<sup>+</sup> T<sub>FH</sub> or CXCR5<sup>-</sup> non-T<sub>FH</sub> populations were then subdivided based on CCR7 and CD45RA expression into naïve, effector memory (EM), central memory (CM), or EM CD45RA<sup>+</sup>. Top panels show example gating. Bottom panels show summary data for 19 CLL and 7 controls. Notably, CLL T<sub>FH</sub> were significantly enriched in effector memory phenotype cells compared to control T<sub>FH</sub>.

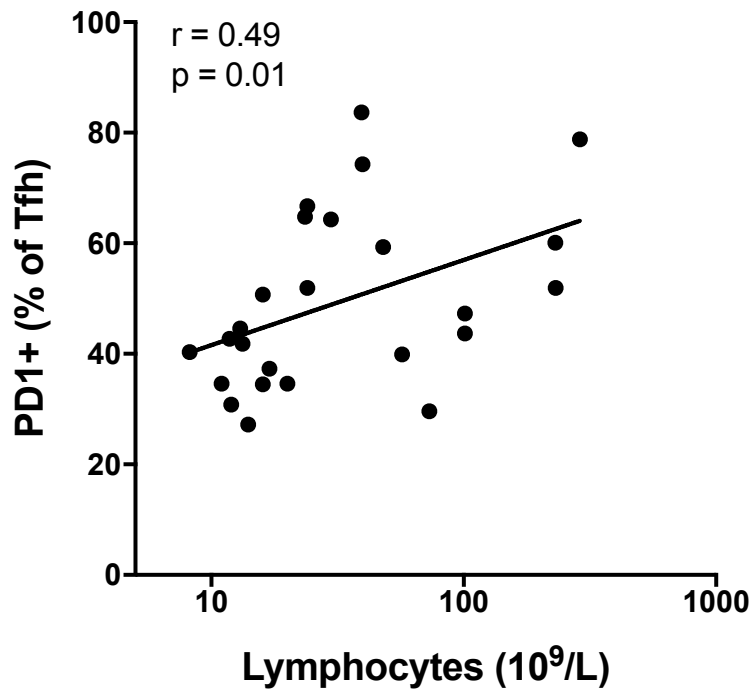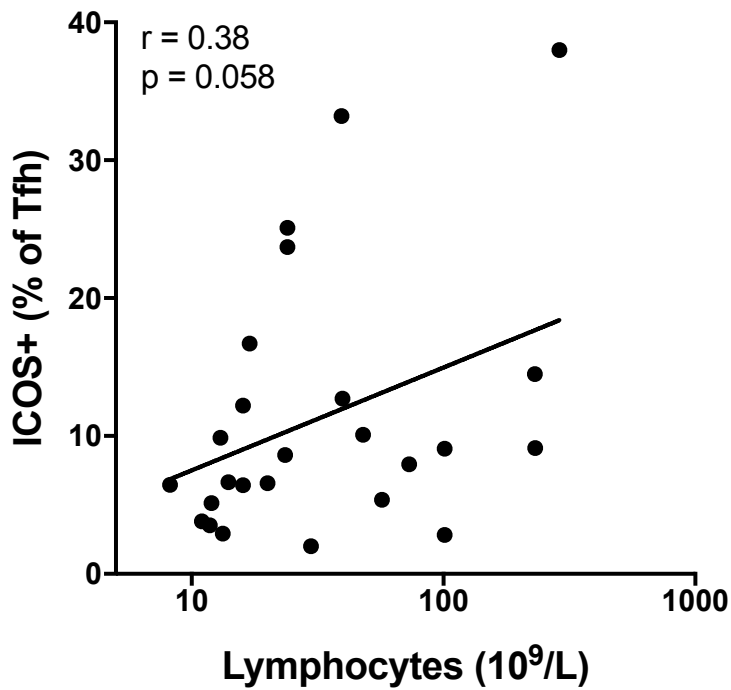

**Figure S3. CLL T<sub>FH</sub> expression of PD-1 and ICOS correlates with patient lymphocyte count.** T<sub>FH</sub> were gated as CD4+CXCR5+CD45RA- and percent PD-1+ or ICOS+ cells were determined for each patient.

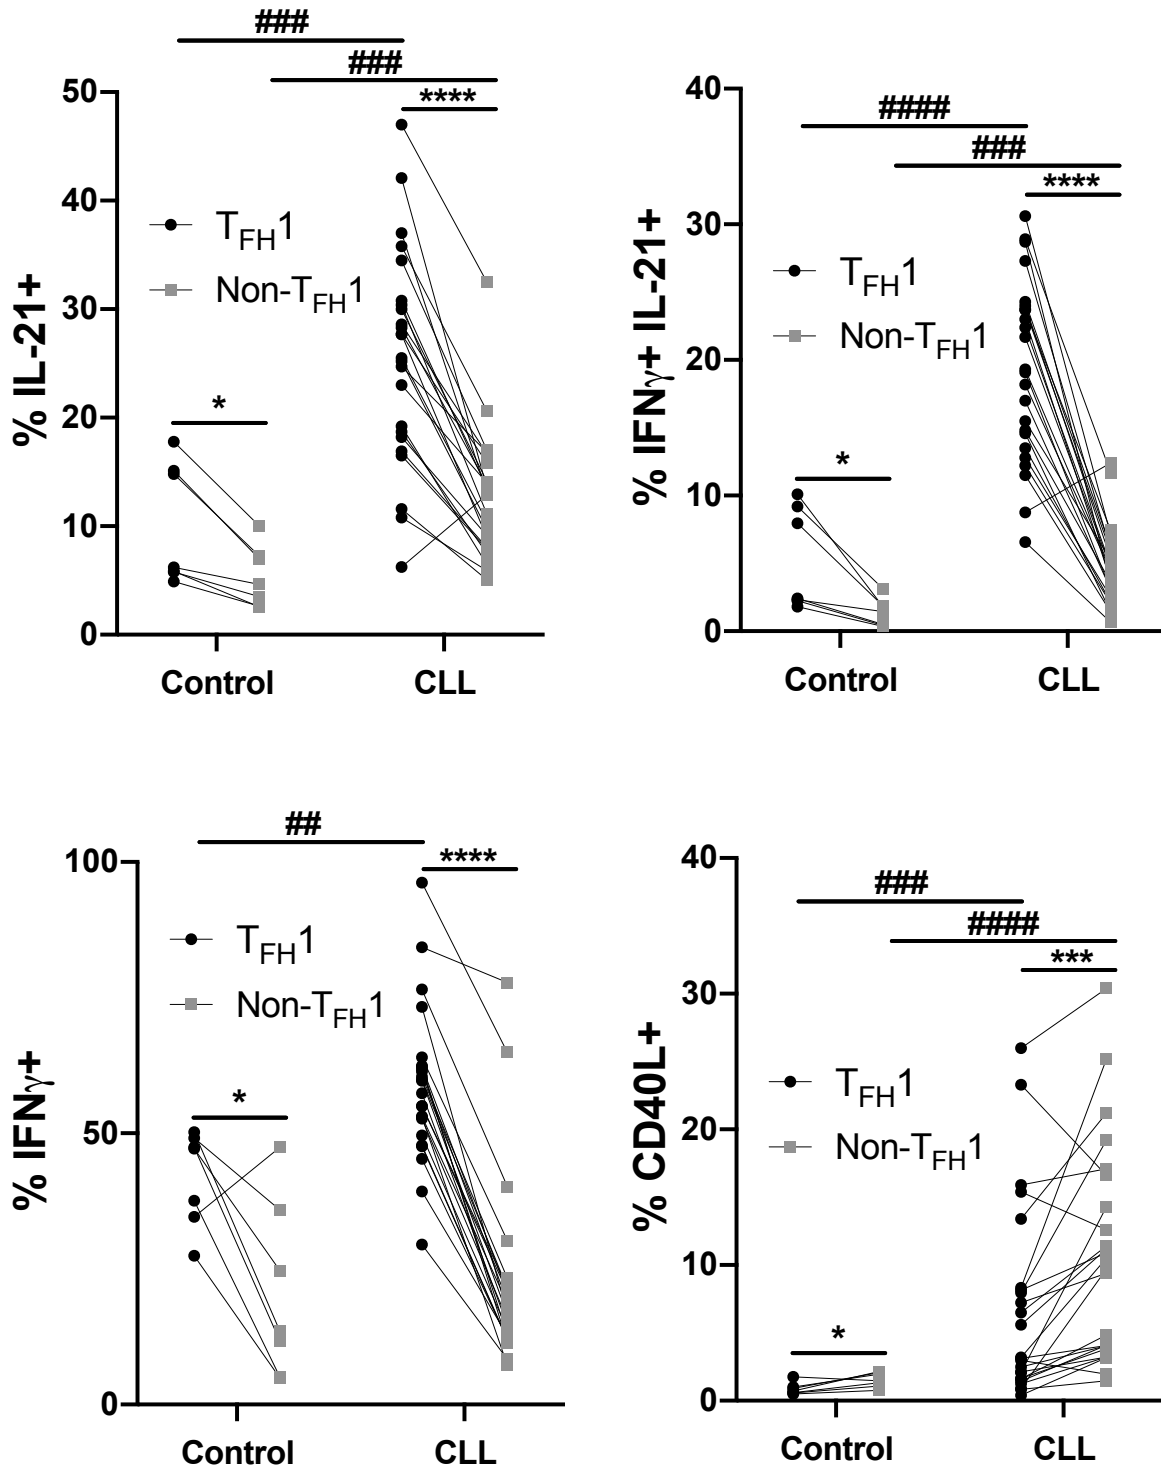

**Figure S4. CLL T<sub>FH</sub>1 cells produce more IL-21 and IFN $\gamma$  but less CD40L than other T<sub>FH</sub> subsets.**

CXCR3+CCR6- T<sub>FH</sub>1 cells were compared for expression of IL-21, IFN $\gamma$  and CD40L relative to all remaining non-T<sub>FH</sub>1 cells within the CD4+CXCR5+ gate.

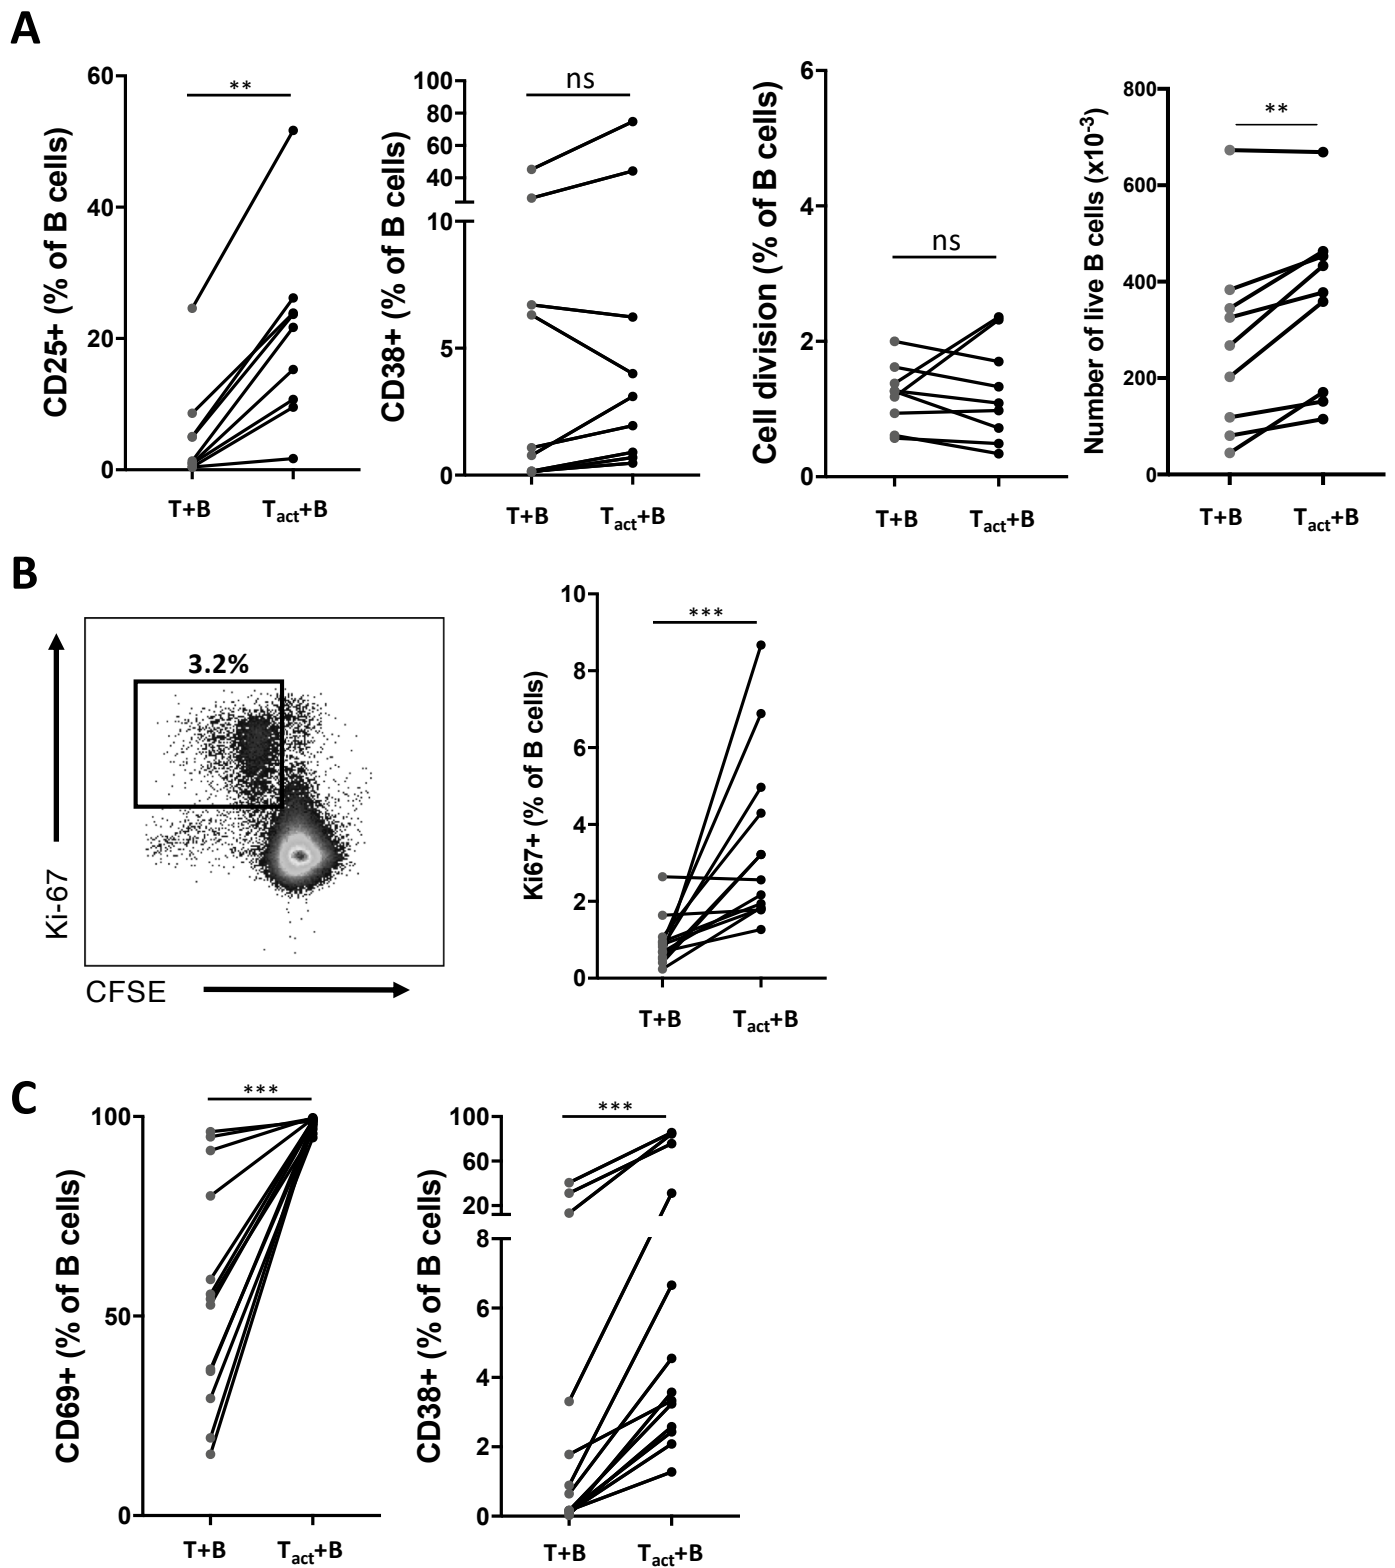

**Figure S5. Impact of activated CD4<sup>+</sup> T cells on CLL activation and proliferation.**

CLL cells were co-cultured with autologous CD4<sup>+</sup> T cells which had been cultured with activation cocktail ( $T_{act}$ ) or medium alone (T). **(A)** After 2 days of co-culture, CLL cell expression of CD25, CD38, cell division (assessed by CFSE dilution) or number of live cells were determined. Individual patient results are connected by lines. **(B)** Expression of Ki-67 on CFSE-low divided B cells after 6 days of co-culture. **(C)** Expression of activation markers CD69 and CD38 on B cells after 6 days of co-culture.

| Target                                                                                  | Fluorochrome    | Company        | Catalog No. | Recommended $\mu\text{L}/\text{sample}^*$ | Titred $\mu\text{L}/\text{sample}^*$ | Surface or Post-fix/perm |
|-----------------------------------------------------------------------------------------|-----------------|----------------|-------------|-------------------------------------------|--------------------------------------|--------------------------|
| <b>Cell surface marker panel</b>                                                        |                 |                |             |                                           |                                      |                          |
| CCR6                                                                                    | BV421           | BD Biosciences | 562515      | 5                                         | 2.5                                  | surface                  |
| CD19                                                                                    | V500            | BD Biosciences | 561121      | 5                                         | 1.25                                 | surface                  |
| CD14                                                                                    | V500            | BD Biosciences | 561391      | 5                                         | 1.25                                 | surface                  |
| CD45RA                                                                                  | BV605           | BD Biosciences | 562886      | 5                                         | 0.625                                | surface                  |
| ICOS                                                                                    | BV650           | BD Biosciences | 563832      | 5                                         | 2.5                                  | surface                  |
| CCR7                                                                                    | BB515           | BD Biosciences | 565869      | 5                                         | 2.5                                  | surface                  |
| CD4                                                                                     | PerCP-Cy5.5     | BD Biosciences | 341654      | 20                                        | 2.5                                  | surface                  |
| CXCR5                                                                                   | PE              | eBioscience    | 12-9185-42  | 5                                         | 1.25                                 | surface                  |
| CXCR3                                                                                   | PE-CF594        | BD Biosciences | 562451      | 5                                         | 1.25                                 | surface                  |
| TIGIT                                                                                   | PE-Cy7          | BioLegend      | 372714      | 10                                        | 1.25                                 | surface                  |
| PD-1                                                                                    | APC             | BD Biosciences | 558694      | 20                                        | 5                                    | surface                  |
| CD3                                                                                     | APC-H7          | BD Biosciences | 560176      | 5                                         | 1.25                                 | surface                  |
| *Amount to stain $1 \times 10^6$ cells in 100 $\mu\text{L}$                             |                 |                |             |                                           |                                      |                          |
| <b>Intracellular marker panel</b>                                                       |                 |                |             |                                           |                                      |                          |
| CCR6                                                                                    | BV421           | BD Biosciences | 562515      | 5                                         | 2.5                                  | surface                  |
| CD19                                                                                    | V500            | BD Biosciences | 561125      | 5                                         | 2.5                                  | surface                  |
| CD14                                                                                    | V500            | BD Biosciences | 561392      | 5                                         | 2.5                                  | surface                  |
| CD40L                                                                                   | BV605           | BioLegend      | 310826      | 5                                         | 2.5                                  | post-fix/perm            |
| IFN gamma                                                                               | BV786           | BD Biosciences | 563731      | 5                                         | 2.5                                  | post-fix/perm            |
| CD4                                                                                     | PerCP-Cy5.5     | BD Biosciences | 341654      | 20                                        | 20                                   | post-fix/perm#           |
| CXCR5                                                                                   | PE              | eBioscience    | 12-9185-42  | 5                                         | 1.25                                 | surface                  |
| CXCR3                                                                                   | PE-CF594        | BD Biosciences | 562451      | 5                                         | 2.5                                  | surface                  |
| IL-21                                                                                   | APC             | BioLegend      | 513008      | 5                                         | 5                                    | post-fix/perm            |
| CD3                                                                                     | APC-H7          | BD Biosciences | 560176      | 5                                         | 2.5                                  | surface                  |
| #stained intracellularly due to reduction of surface CD4 upon PMA/ionomycin stimulation |                 |                |             |                                           |                                      |                          |
| <b>Co-culture analysis panel</b>                                                        |                 |                |             |                                           |                                      |                          |
| CCR6                                                                                    | BV421           | BD Biosciences | 562515      | 5                                         | 2.5                                  | surface                  |
| CD14                                                                                    | V500            | BD Biosciences | 561391      | 5                                         | 2.5                                  | surface                  |
| CD4                                                                                     | BV605           | BD Biosciences | 562658      | 10                                        | 1.25                                 | surface                  |
| OX40                                                                                    | BV650           | BD Biosciences | 563658      | 10                                        | 2.5                                  | surface                  |
| Ki-67                                                                                   | BV786           | BD Biosciences | 563756      |                                           | 5                                    | post-fix/perm            |
| <i>Proliferation</i>                                                                    | <i>CFSE</i>     |                |             |                                           |                                      |                          |
| CD38                                                                                    | PerCP-Cy5.5     | BD Biosciences | 551400      | 10                                        | 5                                    | surface                  |
| CXCR5                                                                                   | PE              | eBioscience    | 12-9185-42  | 5                                         | 1.25                                 | surface                  |
| CXCR3                                                                                   | PE-CF594        | BD Biosciences | 562451      | 5                                         | 1.25                                 | surface                  |
| CD69                                                                                    | PE-Cy7          | BD Biosciences | 557745      | 10                                        | 2.5                                  | surface                  |
| PD-1                                                                                    | APC             | BD Biosciences | 558694      | 20                                        | 5                                    | surface                  |
| CD19                                                                                    | Alexa Fluor 700 | BD Biosciences | 557921      | 5                                         | 2.5                                  | surface                  |
| CD25                                                                                    | APC-H7          | BD Biosciences | 560225      | 10                                        | 2.5                                  | surface                  |

**Table S1. Flow cytometry antibodies**

| Target     | Fluorochrome    | Host species | Mono or polyclonal | Company        | Catalog No. |
|------------|-----------------|--------------|--------------------|----------------|-------------|
| CD3        | n/a             | mouse        | monoclonal         | abcam          | ab17143     |
| CD20       | n/a             | rabbit       | monoclonal         | abcam          | ab64088     |
| CD4        | n/a             | rabbit       | monoclonal         | abcam          | ab133616    |
| CXCR3      | n/a             | mouse        | monoclonal         | abcam          | ab64714     |
| CXCR5      | Alexa Fluor 488 | rabbit       | monoclonal         | abcam          | ab223980    |
| PD-1       | Alexa Fluor 647 | mouse        | monoclonal         | abcam          | ab220301    |
| Ki-67      | BV421           | mouse        | monoclonal         | BD Biosciences | 562899      |
| Mouse IgG1 | Alexa Fluor 568 | goat         | polyclonal         | Invitrogen     | A-21124     |
| Rabbit IgG | Alexa Fluor 488 | goat         | polyclonal         | Invitrogen     | A-11034     |
| Rabbit IgG | Alexa Fluor 647 | goat         | polyclonal         | Invitrogen     | A-21246     |

**Table S2. Immunofluorescence microscopy antibodies**
